# Supplementary material
Source: publisher figshare collection journal article supplement (https://acs.figshare.com/ndownloader/files/9290356)
Supplement: Supplementary file 1 [file 9290356]

# Dendrimer – Dye Assemblies as Templates for the Formation of Gold Nanostructures

## *Supporting Information*

*Jasmin Düring,<sup>†</sup> Wiebke Alex,<sup>†</sup> Alexander Zika,<sup>†</sup> Robert Branscheid,<sup>‡</sup> Erdmann Spiecker,<sup>‡</sup>*

*Franziska Gröhn<sup>†,\*</sup>*

<sup>†</sup> Department of Chemistry and Pharmacy and Interdisciplinary Center for Molecular Materials  
Friedrich-Alexander-University Erlangen-Nürnberg, Egerlandstraße 3, 91058 Erlangen, Germany

<sup>‡</sup> Institute of Micro- and Nanostructure Research & Center for Nanoanalysis and Electron  
Microscopy (CENEM), Friedrich-Alexander-University Erlangen-Nürnberg, Cauerstraße 6,  
91058 Erlangen, Germany

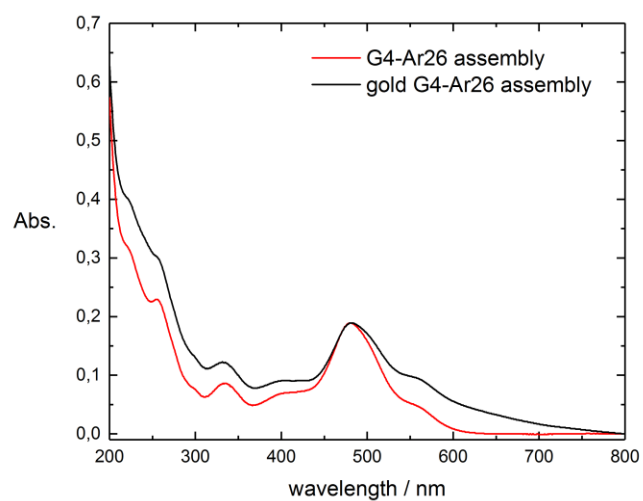

**Figure S1.** Analysis of a gold-G4-Ar26 assembly, reduced with hydrazine: UV-Vis spectrum of G4-Ar26 assemblies (red) and gold-G4-Ar26 assemblies after reduction (black).

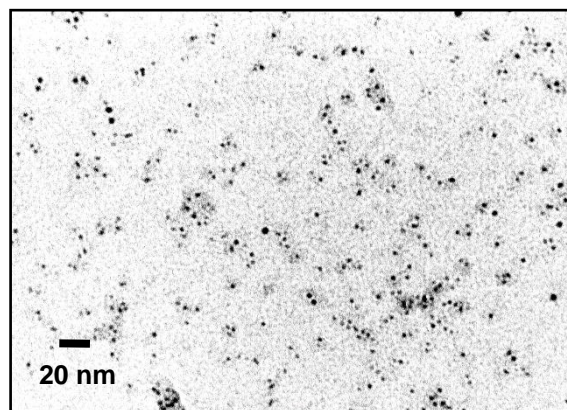

**Figure S2.** TEM of gold-nanoparticle containing G8-dendrimers formed by electrostatic nanotemplating: 3.5 nm gold particles are formed within 11 nm G8 dendrimers. For more details see reference 21.
